# Supplementary material for: Three-dimensional nitrogen–sulfur codoped layered porous carbon nanosheets with sulfur-regulated nitrogen content as a high-performance anode material for potassium-ion batteries
Source: Royal Society of Chemistry journal article supplement (doi:10.1039/d0dt00697a), 2020-01-01
Supplement: d0dt00697a1.pdf [file d0dt00697a1.pdf]

**Three-dimensional nitrogen-sulfur codoped layered porous carbon nanosheets  
with sulfur-regulated nitrogen content as high-performance anode materials for  
potassium-ion batteries**

Ying Zhang<sup>1</sup>, Sheng Tian<sup>1</sup>, Chenghao Yang<sup>2,\*</sup>, Junmin Nan<sup>1,\*</sup>

1. School of Chemistry, South China Normal University, Guangzhou 510006, P.R. China
2. Guangzhou Key Laboratory for Surface Chemistry of Energy Materials, New Energy Research Institute, School of Environment and Energy, South China University of Technology, Guangzhou 510006, P.R. China

Corresponding author: Junmin Nan, Chenghao Yang

Tel.: +86-20-39310255

Fax: +86-20-39310187

E-mail: jmnan@scnu.edu.cn (J. Nan), esyangc@scut.edu.cn (C. Yang)

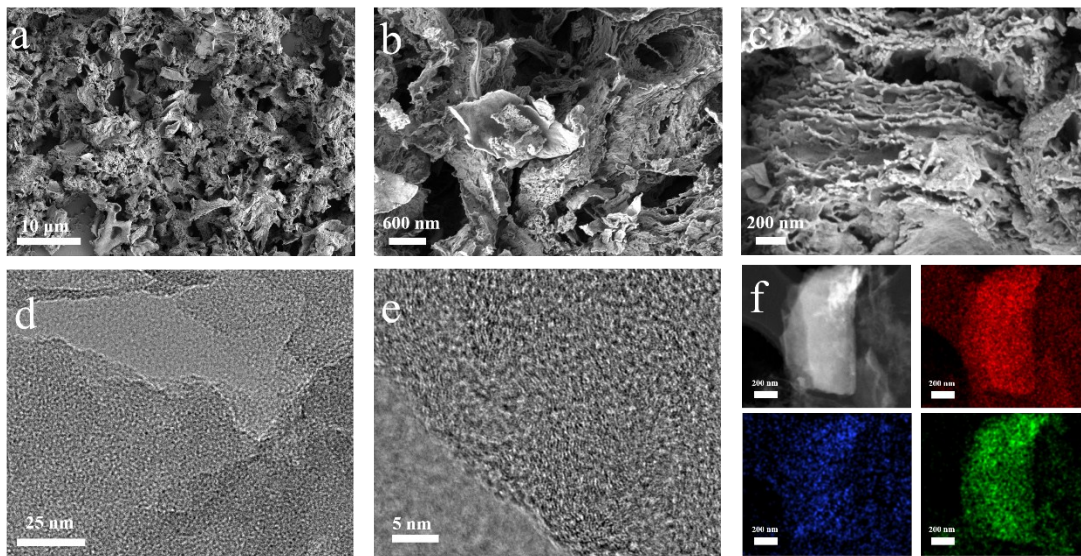

Figure S1 a-c) SEM images of 3D-NCNs. d-e) TEM image of 3D-NCNs. f) EDS element mapping of 3D-NCNs.

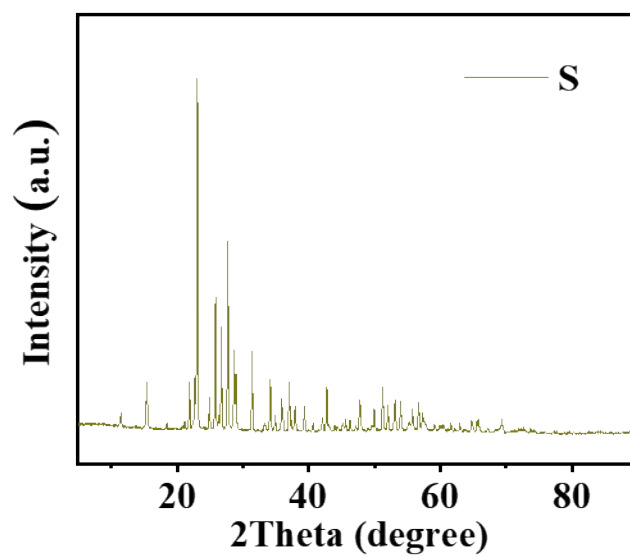

Figure S2 XRD patterns of the S powders.

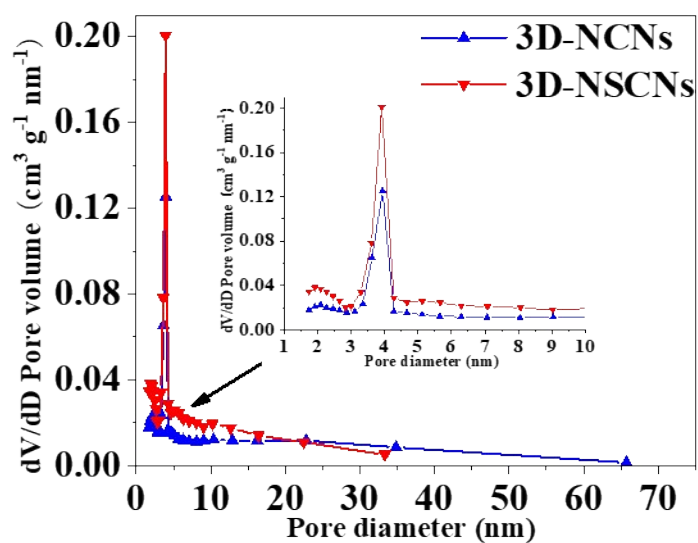

Figure S3 Pore size distribution of 3D-NCNs and 3D-NSCNs.

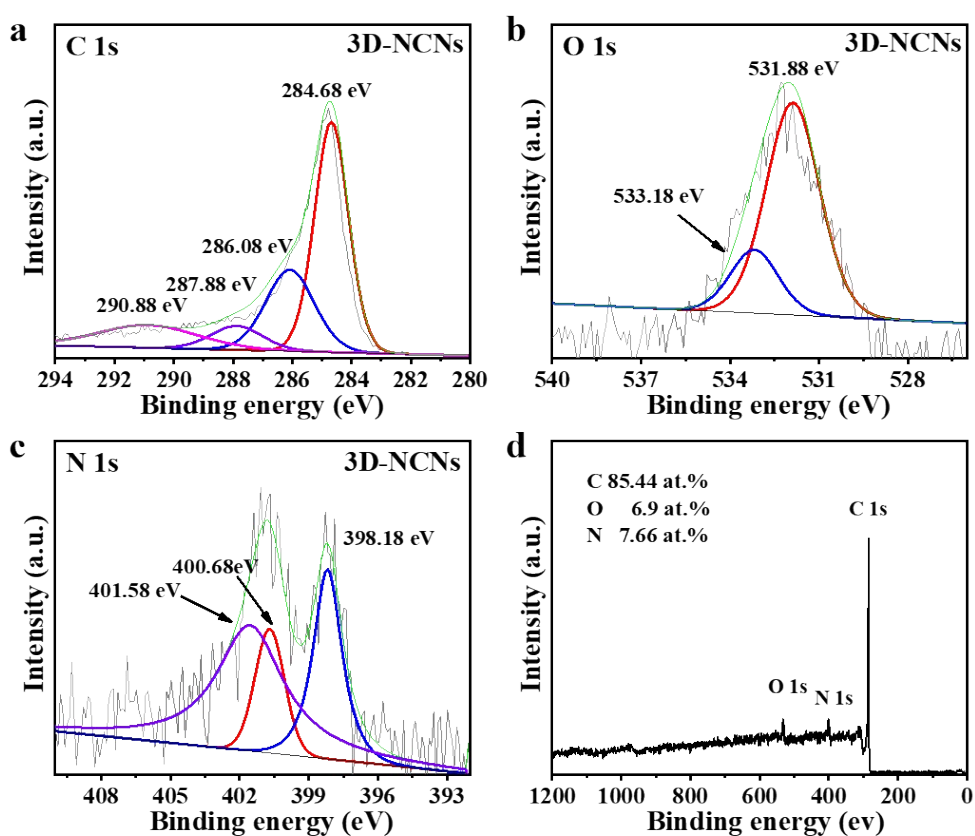

Figure S4 XPS spectra of 3D-NCNs a) C1s, b) O1s and c) N1s. d) XPS survey spectrum of the S-BC-1.
